# Supplementary material for: Sharing Annotated Audio Recordings of Clinic Visits With Patients—Development of the Open Recording Automated Logging System (ORALS): Study Protocol
Source: JMIR Res Protoc. 2017 Jul 6;6(7):e121. doi: 10.2196/resprot.7735 (PMC5519830; doi:10.2196/resprot.7735)
Supplement: Multimedia Appendix 1 [file resprot_v6i7e121_app1.pdf]

MANAGEMENT & STAFF INTERVIEW GUIDE

I. RECORDING IMPLEMENTATION

|      |                                                                                                                                                                                                                                                                                                                                                                                                                                          |
|------|------------------------------------------------------------------------------------------------------------------------------------------------------------------------------------------------------------------------------------------------------------------------------------------------------------------------------------------------------------------------------------------------------------------------------------------|
| Q1.  | What was the clinic's motivation to record and share clinic visits with patients?                                                                                                                                                                                                                                                                                                                                                        |
| Q2.  | How long has your clinic been recording visits?                                                                                                                                                                                                                                                                                                                                                                                          |
| Q3.  | <p>What were/are the major challenges associated with introducing recordings?</p> <ul style="list-style-type: none"> <li>• Was there staff resistance?</li> <li>• Was there patient or caregiver resistance?</li> <li>• Were there legal concerns?</li> <li>• Were there technical challenges?</li> </ul>                                                                                                                                |
| Q4.  | <p>What were/are the major facilitators easing the introduction of recordings?</p> <ul style="list-style-type: none"> <li>• Was staff accepting?</li> <li>• Was it patient and caregiver driven?</li> <li>• Did technology help?</li> </ul>                                                                                                                                                                                              |
| Q5.  | <p>Do recordings fit into the clinic's workflow?</p> <ul style="list-style-type: none"> <li>• If so, how?</li> <li>• If not, why not?</li> </ul>                                                                                                                                                                                                                                                                                         |
| Q6.  | How does a patient walk through the recording process?                                                                                                                                                                                                                                                                                                                                                                                   |
| Q7.  | <p>How was the recording system developed?</p> <ul style="list-style-type: none"> <li>• Was it a package purchased from a technology company?</li> <li>• Was it set up by the clinic? If so, how?</li> <li>• Were patients, caregivers and/or clinicians involved?</li> <li>• Are the recording devices encrypted/secure?</li> <li>• Is there automatic playback on the device or does it need to be plugged into a computer?</li> </ul> |
| Q8.  | <p>Is there anything you would change about the system?</p> <ul style="list-style-type: none"> <li>• The recording technology used in the clinic room?</li> <li>• The way recordings are shared with patients and caregivers?</li> </ul>                                                                                                                                                                                                 |
| Q9.  | <p>Where do you get the resources to support recordings?</p> <ul style="list-style-type: none"> <li>• IT</li> <li>• Hardware</li> <li>• Software</li> <li>• Expertise</li> <li>• Time</li> </ul>                                                                                                                                                                                                                                         |
| Q10. | How do you document which patients record their visits? Is it inputted into the EMR?                                                                                                                                                                                                                                                                                                                                                     |
| Q11. | <p>Describe how you manage/protect the recorded data?</p> <p><b>PROBES:</b></p> <ul style="list-style-type: none"> <li>• Is it on a secure server?</li> <li>• Are files encrypted?</li> <li>• Is access restricted among clinic staff?</li> <li>• How is PHI handled?</li> </ul>                                                                                                                                                         |

## Appendix 2. Interview Topic Guide

|      |                                                                                                                                                                                                                                                                                                                    |
|------|--------------------------------------------------------------------------------------------------------------------------------------------------------------------------------------------------------------------------------------------------------------------------------------------------------------------|
|      | <ul style="list-style-type: none"><li>• Is it HIPAA compliant?</li></ul>                                                                                                                                                                                                                                           |
| Q12. | What are the concerns about the use of recordings? How have you overcome these? <ul style="list-style-type: none"><li>• Legal issues (or concerns) that have resulted from the use of recording? (If yes, explain more and how they were resolved)</li><li>• Privacy concerns from patient or clinician?</li></ul> |
| Q13. | What are the benefits from the use of recordings in the practice? <ul style="list-style-type: none"><li>• Protection from litigation?</li><li>• Patients better managing their own care?</li><li>• Caregivers better prepared?</li></ul>                                                                           |

### II. RECORDING USE

|      |                                                                                                                                                                                                                                                                                                                              |
|------|------------------------------------------------------------------------------------------------------------------------------------------------------------------------------------------------------------------------------------------------------------------------------------------------------------------------------|
| Q14. | Do all of the clinicians in the clinic offer recordings to patients? <ul style="list-style-type: none"><li>• For those who don't, what are the reasons for clinicians choosing not to use of recordings?</li><li>• For those who do (or if all do): what reasons do you believe have led to the use of recordings?</li></ul> |
| Q15. | How have patients responded to having access to their recordings? <ul style="list-style-type: none"><li>• Increased satisfaction?</li><li>• Impact on frequency of clinic visits?</li></ul>                                                                                                                                  |
| Q16. | How have caregivers responded?                                                                                                                                                                                                                                                                                               |
| Q17. | Do you use the recording data in any way (track recordings)? Are you considering using it in the future? <ul style="list-style-type: none"><li>• Review quality of clinician performance?</li><li>• Litigation?</li></ul>                                                                                                    |

### III. TAGGING RECORDINGS

|      |                                                                                                                                                                                                                                                                                                                                          |
|------|------------------------------------------------------------------------------------------------------------------------------------------------------------------------------------------------------------------------------------------------------------------------------------------------------------------------------------------|
| Q18. | If we used technology to highlight parts of the clinic visit, which parts would be most helpful for you? <ul style="list-style-type: none"><li>• Review of medical information?</li><li>• Evaluation of test results?</li><li>• Diagnosis?</li><li>• Treatment options?</li><li>• Treatment decision?</li><li>• Visit summary?</li></ul> |
| Q19. | What might be the <b>benefits</b> to patients of recordings that are tagged? Explain. <ul style="list-style-type: none"><li>• What impact might tagging have on: patient understanding of health issues?</li><li>• On patient ability to adhere to treatment plan?</li><li>• On caregiver preparedness to assist patients?</li></ul>     |
| Q20. | What might be the <b>drawbacks</b> to patients of recordings that are tagged? Explain. <ul style="list-style-type: none"><li>• Mis-tagged recordings (i.e. A part of the recording that is talking about the diagnosis is labeled as medication)</li></ul>                                                                               |

## CLINICIAN INTERVIEW GUIDE

### I. RECORDING IMPLEMENTATION

## Appendix 2. Interview Topic Guide

|      |                                                                                                                                                                                                                                                                                               |
|------|-----------------------------------------------------------------------------------------------------------------------------------------------------------------------------------------------------------------------------------------------------------------------------------------------|
| Q1.  | Do your patients record their visits with you?<br>a) If yes, what proportion of patients record their visits? Of the patients who record, do they record all visits?<br>b) If no, what proportion do you offer recording to?                                                                  |
| Q2.  | Do you document which patients record visits?                                                                                                                                                                                                                                                 |
| Q3.  | Are there groups of patients that recordings are particularly useful for? Why?                                                                                                                                                                                                                |
| Q4.  | Are there patients that recordings are particularly NOT useful for? Why?                                                                                                                                                                                                                      |
| Q5.  | What was your motivation for starting to record visits?<br><ul style="list-style-type: none"> <li>Was it because of extrinsic factors, (i.e. leadership pressure, incentives) or intrinsic (i.e. wanted to improve your patient's care experience)?</li> </ul>                                |
| Q6.  | How long have you been allowing recordings of your visits?                                                                                                                                                                                                                                    |
| Q7.  | What were/are the major challenges associated with introducing recordings?<br><ul style="list-style-type: none"> <li>Was there staff resistance?</li> <li>Was there patient or caregiver resistance?</li> <li>Were there legal concerns?</li> <li>Were there technical challenges?</li> </ul> |
| Q8.  | What were/are the major facilitators easing the introduction of recordings?<br><ul style="list-style-type: none"> <li>Was staff accepting?</li> <li>Was it patient and caregiver driven?</li> <li>Did technology help?</li> </ul>                                                             |
| Q9.  | Do recordings fit into the clinic's workflow?<br>a) If yes, how?<br>b) If no, why not?                                                                                                                                                                                                        |
| Q10. | Does the use of recordings affect your practice style?<br><ul style="list-style-type: none"> <li>The act of making the recording?</li> <li>The impact of patients or caregivers having a recording?</li> </ul>                                                                                |
| Q11. | Do you get resources to support recording? If so, what type?<br><ul style="list-style-type: none"> <li>IT, Hardware, Software, Expertise, Time, Etc.</li> </ul>                                                                                                                               |

## II. RECORDING USE

|      |                                                                                                                                                                                                                                                                                                                                                                                                                               |
|------|-------------------------------------------------------------------------------------------------------------------------------------------------------------------------------------------------------------------------------------------------------------------------------------------------------------------------------------------------------------------------------------------------------------------------------|
| Q12. | Walk me through the recording process, from when the patient enters the exam room to sharing the recording with the patient.<br><ul style="list-style-type: none"> <li>Introducing the concept of recording (Every time? Even with patients who use the system?)</li> <li>Starting the recording?</li> <li>During the recording (practice as normal)?</li> <li>Ending the recording</li> <li>Sharing the recording</li> </ul> |
| Q13. | Do you use the recordings patients make in any way? How?<br><ul style="list-style-type: none"> <li>Do you listen to them again? Yes or no = Why?</li> <li>Share them with colleagues?</li> <li>Would you use the recording if you have access?</li> </ul>                                                                                                                                                                     |

## Appendix 2. Interview Topic Guide

|      |                                                                                                                                                                                                                                                                                                           |
|------|-----------------------------------------------------------------------------------------------------------------------------------------------------------------------------------------------------------------------------------------------------------------------------------------------------------|
| Q14. | Can you imagine a way in which you would use recordings that you aren't doing yet?<br><ul style="list-style-type: none"> <li>• Sharing with colleagues for referral of a patient?</li> <li>• Assessing quality of clinical performance?</li> <li>• Recommending it as an adjunct to treatment?</li> </ul> |
| Q15. | Do you use the recording data in any way (i.e. track recordings)? Are you considering using it in the future?<br><ul style="list-style-type: none"> <li>• Review quality of clinician performance?</li> <li>• Litigation?</li> </ul>                                                                      |
| Q16. | Are there concerns about offering recording to patients?<br><ul style="list-style-type: none"> <li>• Legal issues (or concerns) that have resulted from the use of recording? (If yes, explain more and how they were resolved)</li> <li>• Privacy concerns from patients?</li> </ul>                     |
| Q17. | Are there benefits from the use of recordings in the practice?<br><ul style="list-style-type: none"> <li>• Protection from litigation?</li> <li>• Patients are better managers of their own care?</li> <li>• Caregivers are better prepared?</li> </ul>                                                   |
| Q18. | How have your patients responded to having access to recordings?<br><ul style="list-style-type: none"> <li>• Are they more satisfied?</li> <li>• Do they find it easy to use?</li> <li>• Do they listen to recordings prior to subsequent visits?</li> </ul>                                              |

### III. RECORDING PLATFORM

|      |                                                                                                                                                                                                                                                                                                                                      |
|------|--------------------------------------------------------------------------------------------------------------------------------------------------------------------------------------------------------------------------------------------------------------------------------------------------------------------------------------|
| Q19. | Are there technical aspects of the recording system that facilitate its use by you?<br><ul style="list-style-type: none"> <li>• Process of recording the visit?</li> <li>• Process of sharing the recording?</li> <li>• Quality of recordings?</li> </ul>                                                                            |
| Q20. | Are there changes to the technology that may improve the recording system?<br><ul style="list-style-type: none"> <li>• Process of recording the visit?</li> <li>• Process of sharing the recording?</li> <li>• Clinician interface challenges?</li> <li>• Patient interface challenges?</li> <li>• Quality of recordings?</li> </ul> |

### IV. TAGGING RECORDINGS

|      |                                                                                                                                                                                                                                                                                                                                                    |
|------|----------------------------------------------------------------------------------------------------------------------------------------------------------------------------------------------------------------------------------------------------------------------------------------------------------------------------------------------------|
| Q21. | If we used technology to highlight parts of the clinic visit, which parts would be most helpful for you?<br><ul style="list-style-type: none"> <li>• Review of medical information?</li> <li>• Evaluation of test results?</li> <li>• Diagnosis?</li> <li>• Treatment options?</li> <li>• Treatment decision?</li> <li>• Visit summary?</li> </ul> |
| Q22. | What might be the <b>benefits</b> to patients of recordings that are tagged? Explain.<br><ul style="list-style-type: none"> <li>• What impact might tagging have on: patient understanding of health issues?</li> <li>• On patient ability to adhere to treatment plan?</li> <li>• On caregiver preparedness to assist patients?</li> </ul>        |
| Q23. | What might be the <b>drawbacks</b> to patients of recordings that are tagged? Explain.<br><ul style="list-style-type: none"> <li>• Mis-tagged recordings (i.e. A part of the recording that is talking about the diagnosis is labeled as medication)</li> </ul>                                                                                    |

PATIENT (RECORDING USER) INTERVIEW GUIDE

I. RECORDING IMPLEMENTATION

|     |                                                                                                                                                                                                                                                                                                                                                                                                                                                                                                                                                |
|-----|------------------------------------------------------------------------------------------------------------------------------------------------------------------------------------------------------------------------------------------------------------------------------------------------------------------------------------------------------------------------------------------------------------------------------------------------------------------------------------------------------------------------------------------------|
| Q1. | How did you find out that recordings are offered at your clinic?<br><ul style="list-style-type: none"> <li>• In person</li> <li>• By email?</li> <li>• Your doctor?</li> <li>• Clinic staff?</li> <li>• Friend or family?</li> </ul>                                                                                                                                                                                                                                                                                                           |
| Q2. | What was your motivation for having your visits recorded?<br><ul style="list-style-type: none"> <li>• Felt you were expected to?</li> <li>• Thought it would be useful for your care (how)?</li> </ul>                                                                                                                                                                                                                                                                                                                                         |
| Q3. | How long have you been recording visits? How many times have your visits been recorded?                                                                                                                                                                                                                                                                                                                                                                                                                                                        |
| Q4. | Walk me through the recording process, from when you arrive for your visit to when you receive the recording?<br><ul style="list-style-type: none"> <li>• Does the clinician ask permission to record every time?</li> <li>• Are all of your visits recorded?</li> <li>• Are you aware when the recording begins, do you have to do anything (sign in to an account)?</li> <li>• Do you ever turn the recorder off during a visit? If so, when? And do you typically turn it back on?</li> <li>• When can you access the recording?</li> </ul> |
| Q5. | Do you feel comfortable with the recording process?<br>a) If yes, how long did it take you to get comfortable?<br>b) If no, what makes it uncomfortable?                                                                                                                                                                                                                                                                                                                                                                                       |
| Q6. | Does recording affect how you speak with your clinician?<br><ul style="list-style-type: none"> <li>• Are you more open, or closed?</li> <li>• How aware are you of the recording?</li> </ul>                                                                                                                                                                                                                                                                                                                                                   |
| Q7. | Have you asked other healthcare providers to record visits?                                                                                                                                                                                                                                                                                                                                                                                                                                                                                    |

II. RECORDING USE

|     |                                                                                                                                                                                                                                                                                                                                                                                                                                                      |
|-----|------------------------------------------------------------------------------------------------------------------------------------------------------------------------------------------------------------------------------------------------------------------------------------------------------------------------------------------------------------------------------------------------------------------------------------------------------|
| Q8. | Have you listened back to a recording of your visit?<br><b>If yes,</b><br><ul style="list-style-type: none"> <li>• When do you listen to it?</li> <li>• Where and how do you listen to the recording(s)?</li> <li>• Why do you listen back?</li> <li>• How often do you listen to it?</li> <li>• How long do you spend listening back to a recording?</li> <li>• Can you walk me through that process of listening back to the recording?</li> </ul> |
| Q9. | Have you listened back to a recording of your visit with a friend or family member?<br><ul style="list-style-type: none"> <li>• Why</li> <li>• With whom?</li> </ul>                                                                                                                                                                                                                                                                                 |

## Appendix 2. Interview Topic Guide

|      |                                                                                                                                                                                                                                                                                               |
|------|-----------------------------------------------------------------------------------------------------------------------------------------------------------------------------------------------------------------------------------------------------------------------------------------------|
| Q10. | Have you shared your recording with anyone?<br><ul style="list-style-type: none"> <li>• Why</li> <li>• With whom?</li> </ul>                                                                                                                                                                  |
| Q11. | Was it your idea to share the recording or was the idea of sharing a recording introduced to you?                                                                                                                                                                                             |
| Q12. | Do you have any concerns about recording your visit with the doctor?<br><ul style="list-style-type: none"> <li>• Security issues?</li> <li>• Privacy issues?</li> <li>• Changes to your care?</li> </ul>                                                                                      |
| Q13. | What have been the <b>benefits</b> of offering recordings in your care having recordings of your clinic visit?<br><ul style="list-style-type: none"> <li>• Increased understanding of health?</li> <li>• Ability to share with others?</li> <li>• Capture bad experiences of care?</li> </ul> |
| Q14. | What have been the <b>drawbacks</b> of having recordings of your clinic visit of offering recordings in your care?<br><ul style="list-style-type: none"> <li>• Privacy concerns?</li> <li>• Too much information?</li> </ul>                                                                  |

### III. RECORDING PLATFORM

|      |                                                                                                                                                                                                                                                                                                                                            |
|------|--------------------------------------------------------------------------------------------------------------------------------------------------------------------------------------------------------------------------------------------------------------------------------------------------------------------------------------------|
| Q15. | What was your experience like of using the recording system?<br><ul style="list-style-type: none"> <li>• What was good?</li> <li>• What was bad?</li> <li>• Can you describe the sound quality?</li> <li>• Can you describe how you got access to the recording?</li> <li>• What was the process of sharing the recording like?</li> </ul> |
| Q16. | What features of the recording platform do you like?<br><ul style="list-style-type: none"> <li>• Look</li> <li>• Feel</li> <li>• Layout</li> <li>• Ease of use</li> <li>• Organization of recordings</li> </ul>                                                                                                                            |
| Q17. | What features do you not like or would you change?<br><ul style="list-style-type: none"> <li>• Look &amp; Feel</li> <li>• Layout</li> <li>• Ease of use</li> <li>• Organization of recordings</li> </ul>                                                                                                                                   |
| Q18. | Are there any features missing from the platform?                                                                                                                                                                                                                                                                                          |
| Q19. | Are there technical aspects of the recording system that <b>facilitate</b> its use by you?                                                                                                                                                                                                                                                 |
| Q20. | Are there technical aspects of the recording system that are <b>barriers</b> to its use by you?                                                                                                                                                                                                                                            |
| Q21. | Have you experienced any technical issues?<br><ul style="list-style-type: none"> <li>• Sound quality?</li> <li>• Access issues?</li> <li>• Sharing issues?</li> <li>• Difficulty to use?</li> </ul>                                                                                                                                        |

### IV. TAGGING RECORDINGS

|      |                                                                                                          |
|------|----------------------------------------------------------------------------------------------------------|
| Q22. | If we used technology to highlight parts of the clinic visit, which parts would be most helpful for you? |
|------|----------------------------------------------------------------------------------------------------------|

## Appendix 2. Interview Topic Guide

|      |                                                                                                                                                                                                                                                                                                                                             |
|------|---------------------------------------------------------------------------------------------------------------------------------------------------------------------------------------------------------------------------------------------------------------------------------------------------------------------------------------------|
|      | <ul style="list-style-type: none"><li>● Review of medical information?</li><li>● Evaluation of test results?</li><li>● Diagnosis?</li><li>● Treatment options?</li><li>● Treatment decision?</li><li>● Visit summary?</li></ul>                                                                                                             |
| Q23. | <p>What might be the <b>benefits</b> to patients of recordings that are tagged? Explain.</p> <ul style="list-style-type: none"><li>● What impact might tagging have on: patient understanding of health issues?</li><li>● On patient ability to adhere to treatment plan?</li><li>● On caregiver preparedness to assist patients?</li></ul> |
| Q24. | <p>What might be the <b>drawbacks</b> to patients of recordings that are tagged? Explain.</p> <ul style="list-style-type: none"><li>● Mis-tagged recordings (i.e. A part of the recording that is talking about the diagnosis is labeled as medication)</li></ul>                                                                           |

PATIENT (NON-RECORDING USER) INTERVIEW GUIDE

I. RECORDING IMPLEMENTATION

|     |                                                                                                                            |
|-----|----------------------------------------------------------------------------------------------------------------------------|
| Q1. | How did you find out about the process of recording?                                                                       |
| Q2. | You've indicated that you don't currently record your visits, can you tell me why you have chosen not to use this service? |
| Q3. | Is there anything that would turn this into something you would like to use? Any features?                                 |
| Q4. |                                                                                                                            |

II. TAGGING RECORDINGS

|     |                                                                                                                                                                                                                                                                                                                                                            |
|-----|------------------------------------------------------------------------------------------------------------------------------------------------------------------------------------------------------------------------------------------------------------------------------------------------------------------------------------------------------------|
| Q5. | <p>If we used technology to highlight parts of the clinic visit, which parts would be most helpful for you?</p> <ul style="list-style-type: none"> <li>• Review of medical information?</li> <li>• Evaluation of test results?</li> <li>• Diagnosis?</li> <li>• Treatment options?</li> <li>• Treatment decision?</li> <li>• Visit summary?</li> </ul>     |
| Q6. | <p>What might be the <b>benefits</b> patients of recordings of recordings that are tagged? Explain.</p> <ul style="list-style-type: none"> <li>• What impact might tagging have on: patient understanding of health issues?</li> <li>• On patient ability to adhere to treatment plan?</li> <li>• On caregiver preparedness to assist patients?</li> </ul> |
| Q7. | <ul style="list-style-type: none"> <li>• What might be the <b>drawbacks</b> to patients of recordings that are tagged? Explain.</li> <li>• Mis-tagged recordings (i.e. A part of the recording that is talking about the diagnosis is labeled as medication)</li> </ul>                                                                                    |

FAMILY/CAREGIVER INTERVIEW GUIDE

I. RECORDING USE

|     |                                                                                                                                                                                                                                                                                                                                     |
|-----|-------------------------------------------------------------------------------------------------------------------------------------------------------------------------------------------------------------------------------------------------------------------------------------------------------------------------------------|
| Q1. | Has a family member shared a recording of their visit with you?<br><ul style="list-style-type: none"> <li>• If yes, how did they do this?</li> <li>• Do you listen together in the same room, do you have your own access, or both?</li> </ul>                                                                                      |
| Q2. | Have you listened back to a recording of your family member's visit?<br><ul style="list-style-type: none"> <li>• <u>If yes</u>, what motivated you to listen back to this recording?</li> <li>• To understand patients health issues, treatment plan?</li> <li>• Reassure patient?</li> <li>• Felt obliged to?</li> </ul>           |
| Q3. | Do you listen back to every recording that is shared? (explain)<br><ul style="list-style-type: none"> <li>• <u>If no</u>, can you talk a little more about why you have not listened back to your family member's recording?</li> <li>• Lack of time?</li> <li>• Lack of interest?</li> <li>• Can't make a difference?</li> </ul>   |
| Q4. | What have been the <b>benefits</b> of having access to recordings of these clinic visits?<br><ul style="list-style-type: none"> <li>• Increased understanding of health?</li> <li>• Ability to share with others?</li> <li>• Capture bad experiences of care?</li> <li>• Help you provide better care?</li> </ul>                   |
| Q5. | What have been the <b>drawbacks</b> of having access to recordings of these clinic visits?<br><ul style="list-style-type: none"> <li>• Legal issues (or concerns) that have resulted from the use of recording? (If yes, explain more and how they were resolved)</li> <li>• Privacy concerns from patient or clinician?</li> </ul> |
| Q6. | Do you have concerns about recordings being made of the doctor patient visits?<br><ul style="list-style-type: none"> <li>• Security issues?</li> <li>• Privacy issues?</li> <li>• Changes to your loved one's care?</li> </ul>                                                                                                      |

II. RECORDING PLATFORM

|     |                                                                                                                                                                                                                                                                             |
|-----|-----------------------------------------------------------------------------------------------------------------------------------------------------------------------------------------------------------------------------------------------------------------------------|
| Q7. | What was your experience like of using the recording system?<br><ul style="list-style-type: none"> <li>• What was good?</li> <li>• What was bad?</li> <li>• Can you describe the sound quality?</li> <li>• Can you describe how you got access to the recording?</li> </ul> |
|-----|-----------------------------------------------------------------------------------------------------------------------------------------------------------------------------------------------------------------------------------------------------------------------------|

III. TAGGING RECORDINGS

## Appendix 2. Interview Topic Guide

|      |                                                                                                                                                                                                                                                                                                                                                 |
|------|-------------------------------------------------------------------------------------------------------------------------------------------------------------------------------------------------------------------------------------------------------------------------------------------------------------------------------------------------|
| Q8.  | <p>If we used technology to highlight parts of the clinic visit, which parts would be most helpful for you?</p> <ul style="list-style-type: none"><li>• Review of medical information?</li><li>• Evaluation of test results?</li><li>• Diagnosis?</li><li>• Treatment options?</li><li>• Treatment decision?</li><li>• Visit summary?</li></ul> |
| Q9.  | <p>What might be the <b>benefits</b> to patients of recordings that are tagged? Explain.</p> <ul style="list-style-type: none"><li>• What impact might tagging have on: patient understanding of health issues?</li><li>• On patient ability to adhere to treatment plan?</li><li>• On caregiver preparedness to assist patients?</li></ul>     |
| Q10. | <p>What might be the <b>drawbacks</b> to patients of recordings that are tagged? Explain.</p> <ul style="list-style-type: none"><li>• Mis-tagged recordings (i.e. A part of the recording that is talking about the diagnosis is labeled as medication)</li></ul>                                                                               |

## SYSTEM DEVELOPER INTERVIEW GUIDE

### I. PROCESS

#### *Recording Environment*

|     |                                                                                                                                                                                                                                        |
|-----|----------------------------------------------------------------------------------------------------------------------------------------------------------------------------------------------------------------------------------------|
| Q1. | Where is the recording device (tablet) located? <ul style="list-style-type: none"><li>• Is the device already in the consultation room</li><li>• Does the physician bring it</li><li>• Does patient bring it into the visit?</li></ul> |
| Q2. | How many people normally in the room, and are they participating?                                                                                                                                                                      |
| Q3. | What is the actual sequence of events to start a recording?                                                                                                                                                                            |
| Q4. | Is there a verification system in place? (i.e. this is the correct patient and it is uploaded to the correct medical record)                                                                                                           |
| Q5. | How are recordings put on the server? When and by whom?                                                                                                                                                                                |

#### *Equipment*

|      |                                                             |
|------|-------------------------------------------------------------|
| Q6.  | What sort of equipment was used during recording?           |
| Q7.  | Were there any quality problems?                            |
| Q8.  | What were common technical problems during recording?       |
| Q9.  | What is the actual sequence of events to start a recording? |
| Q10. | Have there been any battery life or disk-space problems?    |

### II. RECORDING PLATFORM

#### *Patient-facing*

|      |                                          |
|------|------------------------------------------|
| Q11. | How do patients access recordings?       |
| Q12. | What features does the platform contain? |

#### *Physician-facing*

|      |                                          |
|------|------------------------------------------|
| Q13. | How do providers access recordings?      |
| Q14. | What features does the platform contain? |

### III. SECURITY

#### *Storage, transfer & access*

|      |                                                                                                                   |
|------|-------------------------------------------------------------------------------------------------------------------|
| Q15. | Once recording is made, how is it shared with patients?                                                           |
| Q16. | Are recording files encrypted?                                                                                    |
| Q17. | What happens to recordings after they are shared with patients (are they deleted or stored in the clinic system)? |
| Q18. | Where is the server? Prompt: can the device be locked up?                                                         |
| Q19. | How is data shared with patients & with family members?                                                           |
| Q20. | Are they able to download the data (recording)?                                                                   |
| Q21. | What's security like for the device (tablet) itself (while it contains recordings)?                               |

#### IV. USAGE

|      |                                                                                     |
|------|-------------------------------------------------------------------------------------|
| Q22. | Any usage stats?                                                                    |
| Q23. | How many users per account? (Just the patient, the patient's family, etc.)          |
| Q24. | What information do you collect on the person (meta data)? How is this collected?   |
| Q25. | Who is generating the metadata?                                                     |
| Q26. | How soon after the visit are recordings accessible?                                 |
| Q27. | For how long are recordings accessible?                                             |
| Q28. | What's security like for the device (tablet) itself (while it contains recordings)? |
| Q29. | How often do: 1) patients 2) clinicians <b>listen</b> to recordings?                |
| Q30. | How often do 1) patients 2) clinicians <b>share</b> recordings?                     |

#### V. SUPPORT

|      |                                                                                                                                   |
|------|-----------------------------------------------------------------------------------------------------------------------------------|
| Q31. | Do you provide user support? If so, how much user support?                                                                        |
| Q32. | What are common technical problems users have?                                                                                    |
| Q33. | Is documentation available for users (e.g. patient facing materials explaining or introducing the system; system specifications)? |
| Q34. | How do physicians get technical support and training?                                                                             |
| Q35. | What are the common problems they encounter? Is there documentation of these problems?                                            |
