# Supplementary material for: Sharing Annotated Audio Recordings of Clinic Visits With Patients—Development of the Open Recording Automated Logging System (ORALS): Study Protocol
Source: PubMed Central journal article supplement (PMC5519830; doi:10.2196/resprot.7735), 2017-07-06
Supplement: resprot_v6i7e121_app2.pdf [file resprot_v6i7e121_app2.pdf]

## Appendix 3.

### PAM Questions

|        |                                                                                                                         |                   |          |       |                |     |
|--------|-------------------------------------------------------------------------------------------------------------------------|-------------------|----------|-------|----------------|-----|
| PAM_1  | When all is said and done, I am the person who is responsible for taking care of my health                              | Disagree strongly | Disagree | Agree | Agree strongly | N/A |
| PAM_2  | Taking an active role in my own health care is the most important thing that affects my health                          | Disagree strongly | Disagree | Agree | Agree strongly | N/A |
| PAM_3  | I am confident I can help prevent or reduce problems associated with my health                                          | Disagree strongly | Disagree | Agree | Agree strongly | N/A |
| PAM_4  | I know what each of my prescribed medications do                                                                        | Disagree strongly | Disagree | Agree | Agree strongly | N/A |
| PAM_5  | I am confident that I can tell whether I need to go to the doctor or whether I can take care of a health problem myself | Disagree strongly | Disagree | Agree | Agree strongly | N/A |
| PAM_6  | I am confident that I can tell a doctor concerns I have even when he or she does not ask                                | Disagree strongly | Disagree | Agree | Agree strongly | N/A |
| PAM_7  | I am confident that I can follow through on medical treatments I may need to do at home                                 | Disagree strongly | Disagree | Agree | Agree strongly | N/A |
| PAM_8  | I understand my health problems and what causes them                                                                    | Disagree strongly | Disagree | Agree | Agree strongly | N/A |
| PAM_9  | I know what treatments are available for my health problems                                                             | Disagree strongly | Disagree | Agree | Agree strongly | N/A |
| PAM_10 | I have been able to maintain (keep up with) lifestyle changes, like eating right or exercising                          | Disagree strongly | Disagree | Agree | Agree strongly | N/A |
| PAM_11 | I know how to prevent problems with my health                                                                           | Disagree strongly | Disagree | Agree | Agree strongly | N/A |
| PAM_12 | I am confident I can figure out solutions when new problems arise with my health                                        | Disagree strongly | Disagree | Agree | Agree strongly | N/A |
| PAM_13 | I am confident that I can maintain lifestyle changes, like eating right and exercising, even during times of stress     | Disagree strongly | Disagree | Agree | Agree strongly | N/A |
